# Supplementary material
Source: MDPI journal article supplement (https://www.mdpi.com/search?q=molecules-24-01662)
Supplement: s001 [file molecules-24-01662-s001.pdf]

1 Simultaneous determination of bufalin and its nine metabolites in rat  
2 plasma for characterization of metabolic profiles and pharmacokinetic  
3 study by LC-MS/MS

4 Wenlong Wei †, Yang Yu †, Xia Wang, Linhui Yang, Hang Zhang, Hongjian Ji,  
5 Zhenwei Li, Jinjun HOU, Wanying Wu \*, Dean Guo \*

6  
7  
8 **Affiliation**

9  
10 Shanghai Research Center for Modernization of Traditional Chinese Medicine,  
11 National Engineering Laboratory for TCM Standardization Technology, Shanghai  
12 Institute of Materia Medica, Chinese Academy of Science, Shanghai, 201203,  
13 China

14  
15 † These two authors contributed equally to this work  
16  
17

18 **Correspondence:**

19 Prof. Wanying Wu, Shanghai Research Center for Modernization of Traditional  
20 Chinese Medicine, National Engineering Laboratory for TCM Standardization  
21 Technology, Shanghai Institute of Materia Medica, Chinese Academy of Sciences,  
22 Haike Road 501, Shanghai 201203, China.

23 Email: [wanyingwu@simm.ac.cn](mailto:wanyingwu@simm.ac.cn) Phone: +86 21 20231000 2221 Fax: +86 21  
24 50272789

25  
26 Prof. De-an Guo, Shanghai Research Center for Modernization of Traditional Chinese  
27 Medicine, National Engineering Laboratory for TCM Standardization Technology,

28 Shanghai Institute of Materia Medica, Chinese Academy of Sciences, Haik Road 501,

29 Shanghai 201203, China.

30 Email: [daguo@simm.ac.cn](mailto:daguo@simm.ac.cn) Phone: +86 21 20231000 2221 Fax: +86 21 50272789

31

## Supporting Information

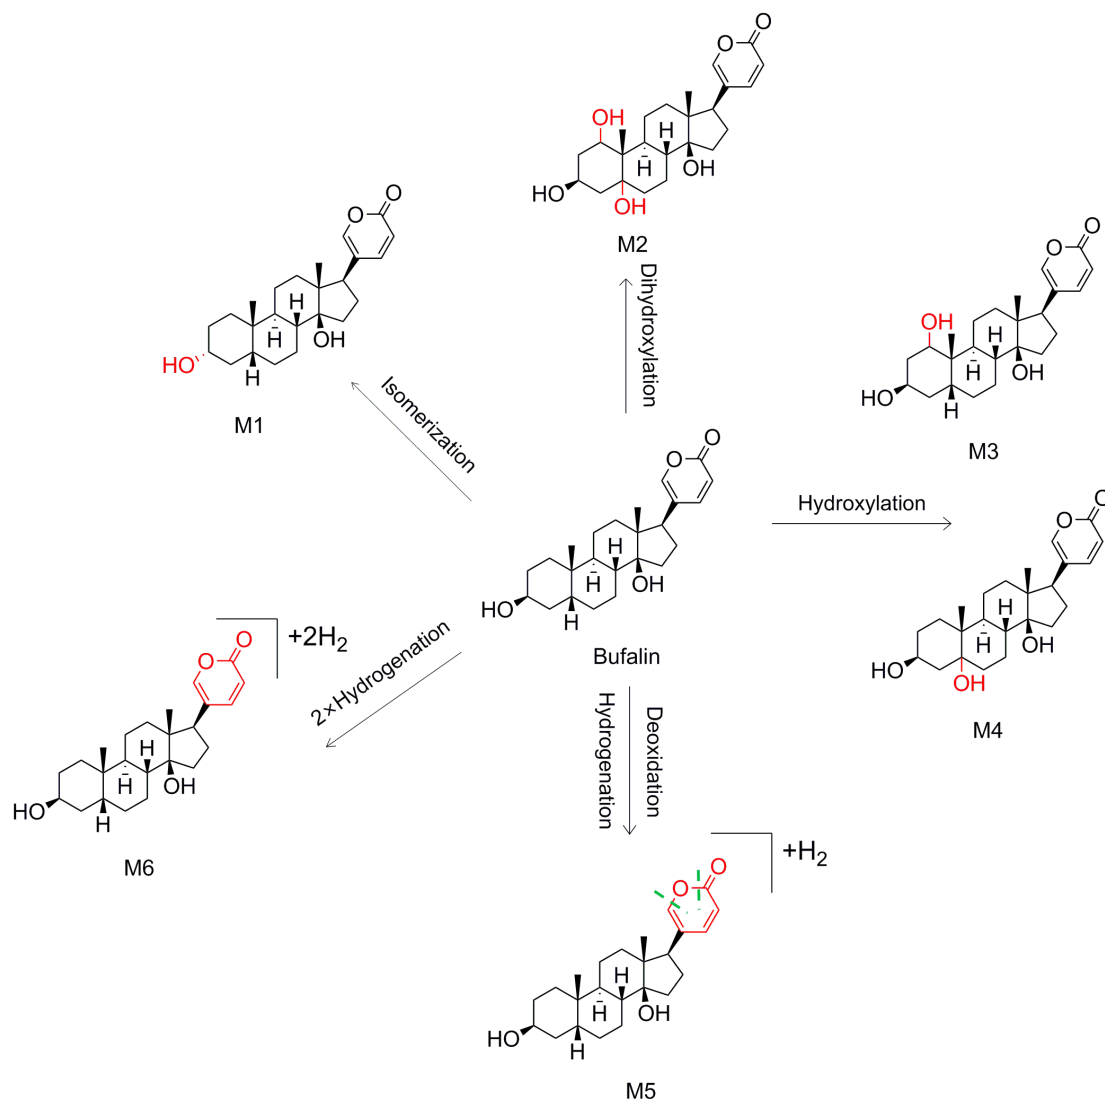

33

34

Figure S1 Proposed metabolic pathways of bufalin (M1, 3-epi-bufalin; M2, dihydroxylated bufalin; M3, 1- hydroxylated bufalin; M4, 5- hydroxylated bufalin;

35

M5, deoxidation-hydrogenation-bufalin; M6, 2x-hydrogenation-bufalin)

36

37

38

39

40

41

Table S1 The transformations included in UNIFI software

| Name                        | Deita mass (Da) | Formula                                                       | Classifier |
|-----------------------------|-----------------|---------------------------------------------------------------|------------|
| Decarboxylation             | -43.9898        | COO                                                           | phase I    |
| Propyl ketone to acid       | -40.0677        | O-C <sub>4</sub> H <sub>8</sub>                               | phase I    |
| Tert-butyl to alcohol       | -40.0677        | O-C <sub>4</sub> H <sub>8</sub>                               | phase I    |
| Nitro reduction             | -29.9742        | H <sub>2</sub> +O <sub>2</sub>                                | phase I    |
| Decarbonylation             | -27.9949        | COO                                                           | phase I    |
| Ethyl ketone to acid        | -26.052         | O-C <sub>3</sub> H <sub>6</sub>                               | phase I    |
| Isopropyl to alcohol        | -26.052         | O-C <sub>3</sub> H <sub>7</sub>                               | phase I    |
| Dehydration                 | -18.0106        | H <sub>2</sub> O                                              | phase I    |
| Aromatization               | -6.047          | H <sub>6</sub>                                                | phase I    |
| 2 × Desaturation            | -4.0313         | H <sub>4</sub>                                                | phase I    |
| Desaturation                | -2.0157         | H <sub>2</sub>                                                | phase I    |
| Reduction                   | 2.0157          | H <sub>2</sub>                                                | phase I    |
| Oxidation+desaturation      | 13.9793         | O-H <sub>2</sub>                                              | phase I    |
| Methylation                 | 14.0157         | CH <sub>2</sub>                                               | phase II   |
| Oxidation                   | 15.9949         | O                                                             | phase I    |
| Hydration                   | 18.0106         | H <sub>2</sub> O                                              | phase I    |
| Formylation                 | 27.9949         | CO                                                            | phase II   |
| 2×Oxidation + desaturation  | 29.9742         | O <sub>2</sub> -H <sub>2</sub>                                | phase I    |
| 2 × Oxidation               | 31.9898         | O <sub>2</sub>                                                | phase I    |
| Dihydrondiol formation      | 34.0055         | H <sub>2</sub> O <sub>2</sub>                                 | phase I    |
| Acetylation                 | 42.0106         | C <sub>2</sub> H <sub>2</sub> O                               | phase II   |
| 3 × Oxidation               | 47.9847         | O <sub>3</sub>                                                | phase I    |
| Propionyl conjugation       | 56.0262         | C <sub>3</sub> H <sub>4</sub> O                               | phase II   |
| Glycine conjugation         | 57.0251         | C <sub>2</sub> H <sub>3</sub> NO                              | phase II   |
| Butyryl conjugation         | 70.0419         | C <sub>4</sub> H <sub>6</sub> O                               | phase II   |
| Sulfation                   | 79.9568         | SO <sub>3</sub>                                               | phase II   |
| Phosphorylation             | 79.9663         | HPO <sub>3</sub>                                              | phase II   |
| Malony                      | 86.0004         | C <sub>3</sub> H <sub>2</sub> O <sub>3</sub>                  |            |
| Cysteine conjugation        | 103.0092        | C <sub>3</sub> H <sub>5</sub> NOS                             | phase II   |
| Taurine conjugation         | 107.0041        | C <sub>2</sub> H <sub>5</sub> NO <sub>2</sub> S               | phase II   |
| Cysteine S-conjugation      | 119.0041        | C <sub>3</sub> H <sub>5</sub> NO <sub>2</sub> S               | phase II   |
| Glutamine conjugation       | 129.0426        | C <sub>5</sub> H <sub>7</sub> O <sub>3</sub> N                | phase II   |
| Pentose                     | 132.0432        | C <sub>5</sub> H <sub>8</sub> O <sub>4</sub>                  |            |
| Carnitine conjugation       | 144.1025        | C <sub>7</sub> H <sub>14</sub> O <sub>2</sub> N               | phase II   |
| Rhamnose                    | 146.0579        | C <sub>6</sub> H <sub>10</sub> O <sub>4</sub>                 |            |
| Acetyl cysteine conjugation | 161.0147        | C <sub>5</sub> H <sub>7</sub> NO <sub>3</sub> S               | phase II   |
| Glucosylation               | 162.0528        | C <sub>6</sub> H <sub>10</sub> O <sub>5</sub>                 | phase II   |
| Hex                         | 162.0528        | C <sub>6</sub> H <sub>10</sub> O <sub>5</sub>                 |            |
| Hexose                      | 162.0528        | C <sub>6</sub> H <sub>10</sub> O <sub>5</sub>                 |            |
| Gysgly S adduction          | 176.0526        | C <sub>5</sub> H <sub>8</sub> N <sub>2</sub> O <sub>3</sub> S | phase II   |
| Glucuronidation             | 176.0321        | C <sub>6</sub> H <sub>8</sub> O <sub>6</sub>                  | phase II   |

|                              |          |                       |          |
|------------------------------|----------|-----------------------|----------|
| Glucuronidation of carbamate | 220.0219 | $C_7H_8O_8$           | phase II |
| Glutathione conjugation      | 289.0732 | $C_{10}H_{15}N_3O_5S$ | phase II |
| Glutathione S-conjugation    | 305.0682 | $C_{10}H_{15}N_3O_6S$ | phase II |

---

43

44

45 Table S2 The concentration (ng/mL) of bufalin, 3-epi-bufalin and dihydroxylatedbufalin in rats after oral administration of 10 mg/kg (n = 3)

| NO.<br>Time<br>(h) | Bufalin |       |       | 3-epi-bufalin |         |         | Dihydroxylatedbufalin (0.84 min) |      |      | Dihydroxylatedbufalin (1.59 min) |       |       | Dihydroxylatedbufalin (2.68 min) |      |      |
|--------------------|---------|-------|-------|---------------|---------|---------|----------------------------------|------|------|----------------------------------|-------|-------|----------------------------------|------|------|
|                    | 1       | 2     | 3     | 1             | 2       | 3       | 1                                | 2    | 3    | 1                                | 2     | 3     | 1                                | 2    | 3    |
| 0.083              | 10.69   | 15.40 | 11.00 | 1065.55       | 519.94  | 267.21  | 0.00                             | 0.00 | 0.00 | 0.00                             | 0.00  | 0.00  | 0.00                             | 0.00 | 0.00 |
| 0.25               | 10.27   | 19.60 | 14.30 | 1279.06       | 1033.45 | 922.14  | 2.93                             | 2.13 | 2.21 | 2.03                             | 1.50  | 1.17  | 0.84                             | 0.73 | 0.75 |
| 0.50               | 6.69    | 11.80 | 10.70 | 1089.87       | 1073.99 | 1175.66 | 6.39                             | 5.68 | 6.71 | 5.17                             | 5.90  | 7.77  | 1.88                             | 2.33 | 3.00 |
| 0.75               | 5.09    | 7.63  | 10.30 | 820.96        | 790.21  | 1141.46 | 5.65                             | 6.96 | 7.17 | 7.80                             | 10.28 | 10.37 | 2.18                             | 3.65 | 3.27 |
| 1.00               | 5.50    | 6.65  | 9.95  | 643.93        | 586.15  | 710.87  | 6.58                             | 7.50 | 6.64 | 9.70                             | 13.45 | 12.42 | 2.36                             | 5.04 | 2.92 |
| 2.00               | 4.63    | 5.50  | 8.24  | 552.04        | 209.80  | 413.29  | 5.52                             | 4.14 | 4.44 | 15.00                            | 22.03 | 24.27 | 2.66                             | 3.92 | 4.02 |
| 4.00               | 2.61    | 3.07  | 3.14  | 261.50        | 178.05  | 179.88  | 2.24                             | 1.65 | 1.60 | 12.57                            | 13.05 | 10.87 | 1.63                             | 1.55 | 1.31 |
| 6.00               | 1.30    | 1.66  | 3.20  | 260.14        | 148.32  | 283.71  | 2.57                             | 1.66 | 1.67 | 7.58                             | 8.92  | 11.55 | 0.64                             | 1.45 | 0.88 |
| 8.00               | 1.60    | 1.19  | 1.68  | 109.33        | 94.94   | 160.87  | 0.97                             | 0.75 | 1.87 | 5.82                             | 5.77  | 8.05  | 0.11                             | 0.59 | 0.97 |
| 10.00              | 1.22    | 2.01  | 2.34  | 102.44        | 121.96  | 189.74  | 0.32                             | 1.49 | 1.70 | 2.15                             | 5.73  | 11.36 | 0.40                             | 1.09 | 1.78 |

46

47

Table S3 The concentration (ng/mL) of hydroxylatedbufalin in rats after oral administration of 10 mg/kg (n = 3)

| NO.<br>Time<br>(h) | Hydroxylatedbufalin |       |       | Hydroxylatedbufalin |       |       | Hydroxylatedbufalin |       |       | Hydroxylatedbufalin |        |        | Hydroxylatedbufalin |        |        |
|--------------------|---------------------|-------|-------|---------------------|-------|-------|---------------------|-------|-------|---------------------|--------|--------|---------------------|--------|--------|
|                    | (1.63 min)          |       |       | (3.81 min)          |       |       | (1.29 min)          |       |       | (2.02 min)          |        |        | (3.42 min)          |        |        |
|                    | 1                   | 2     | 3     | 1                   | 2     | 3     | 1                   | 2     | 3     | 1                   | 2      | 3      | 1                   | 2      | 3      |
| 0.083              | 7.75                | 3.07  | 0.88  | 0.00                | 0.00  | 0.00  | 32.84               | 11.90 | 4.76  | 190.57              | 77.37  | 40.59  | 57.23               | 27.84  | 20.87  |
| 0.25               | 11.83               | 12.64 | 7.14  | 1.98                | 1.87  | 1.59  | 51.63               | 43.38 | 34.39 | 253.91              | 260.48 | 243.26 | 79.08               | 88.86  | 78.47  |
| 0.50               | 14.26               | 17.44 | 14.18 | 5.30                | 5.34  | 6.42  | 65.78               | 67.17 | 62.77 | 265.53              | 352.37 | 376.36 | 87.63               | 136.83 | 129.18 |
| 0.75               | 12.36               | 18.38 | 16.38 | 7.17                | 8.79  | 8.88  | 62.61               | 67.23 | 73.99 | 206.41              | 333.45 | 385.12 | 83.83               | 130.75 | 133.00 |
| 1.00               | 11.73               | 16.63 | 11.50 | 11.41               | 11.36 | 10.59 | 59.76               | 61.29 | 54.04 | 161.01              | 267.91 | 255.23 | 78.87               | 115.21 | 106.64 |
| 2.00               | 8.73                | 6.76  | 8.30  | 17.00               | 16.83 | 22.72 | 37.49               | 26.36 | 38.64 | 119.83              | 94.26  | 158.36 | 50.58               | 39.13  | 60.19  |
| 4.00               | 2.88                | 3.08  | 2.94  | 16.37               | 12.50 | 18.12 | 13.10               | 10.41 | 10.02 | 53.32               | 48.59  | 53.19  | 16.27               | 16.49  | 16.22  |
| 6.00               | 2.75                | 2.25  | 2.84  | 12.89               | 11.90 | 14.69 | 12.47               | 10.75 | 13.57 | 51.53               | 45.07  | 89.34  | 17.11               | 15.61  | 24.84  |
| 8.00               | 1.45                | 1.03  | 2.16  | 11.30               | 6.69  | 13.33 | 5.04                | 5.86  | 9.32  | 22.18               | 27.17  | 51.01  | 6.83                | 8.18   | 17.00  |
| 10.00              | 0.43                | 1.03  | 2.30  | 7.04                | 6.96  | 17.00 | 3.11                | 8.59  | 10.66 | 15.00               | 35.34  | 57.28  | 4.45                | 10.82  | 18.40  |
